# Supplementary material
Source: PubMed Central journal article supplement (PMC4041708)
Supplement: NIHMS574212-supplement-1.pdf [file NIHMS574212-supplement-1.pdf]

# Supplemental figure 1

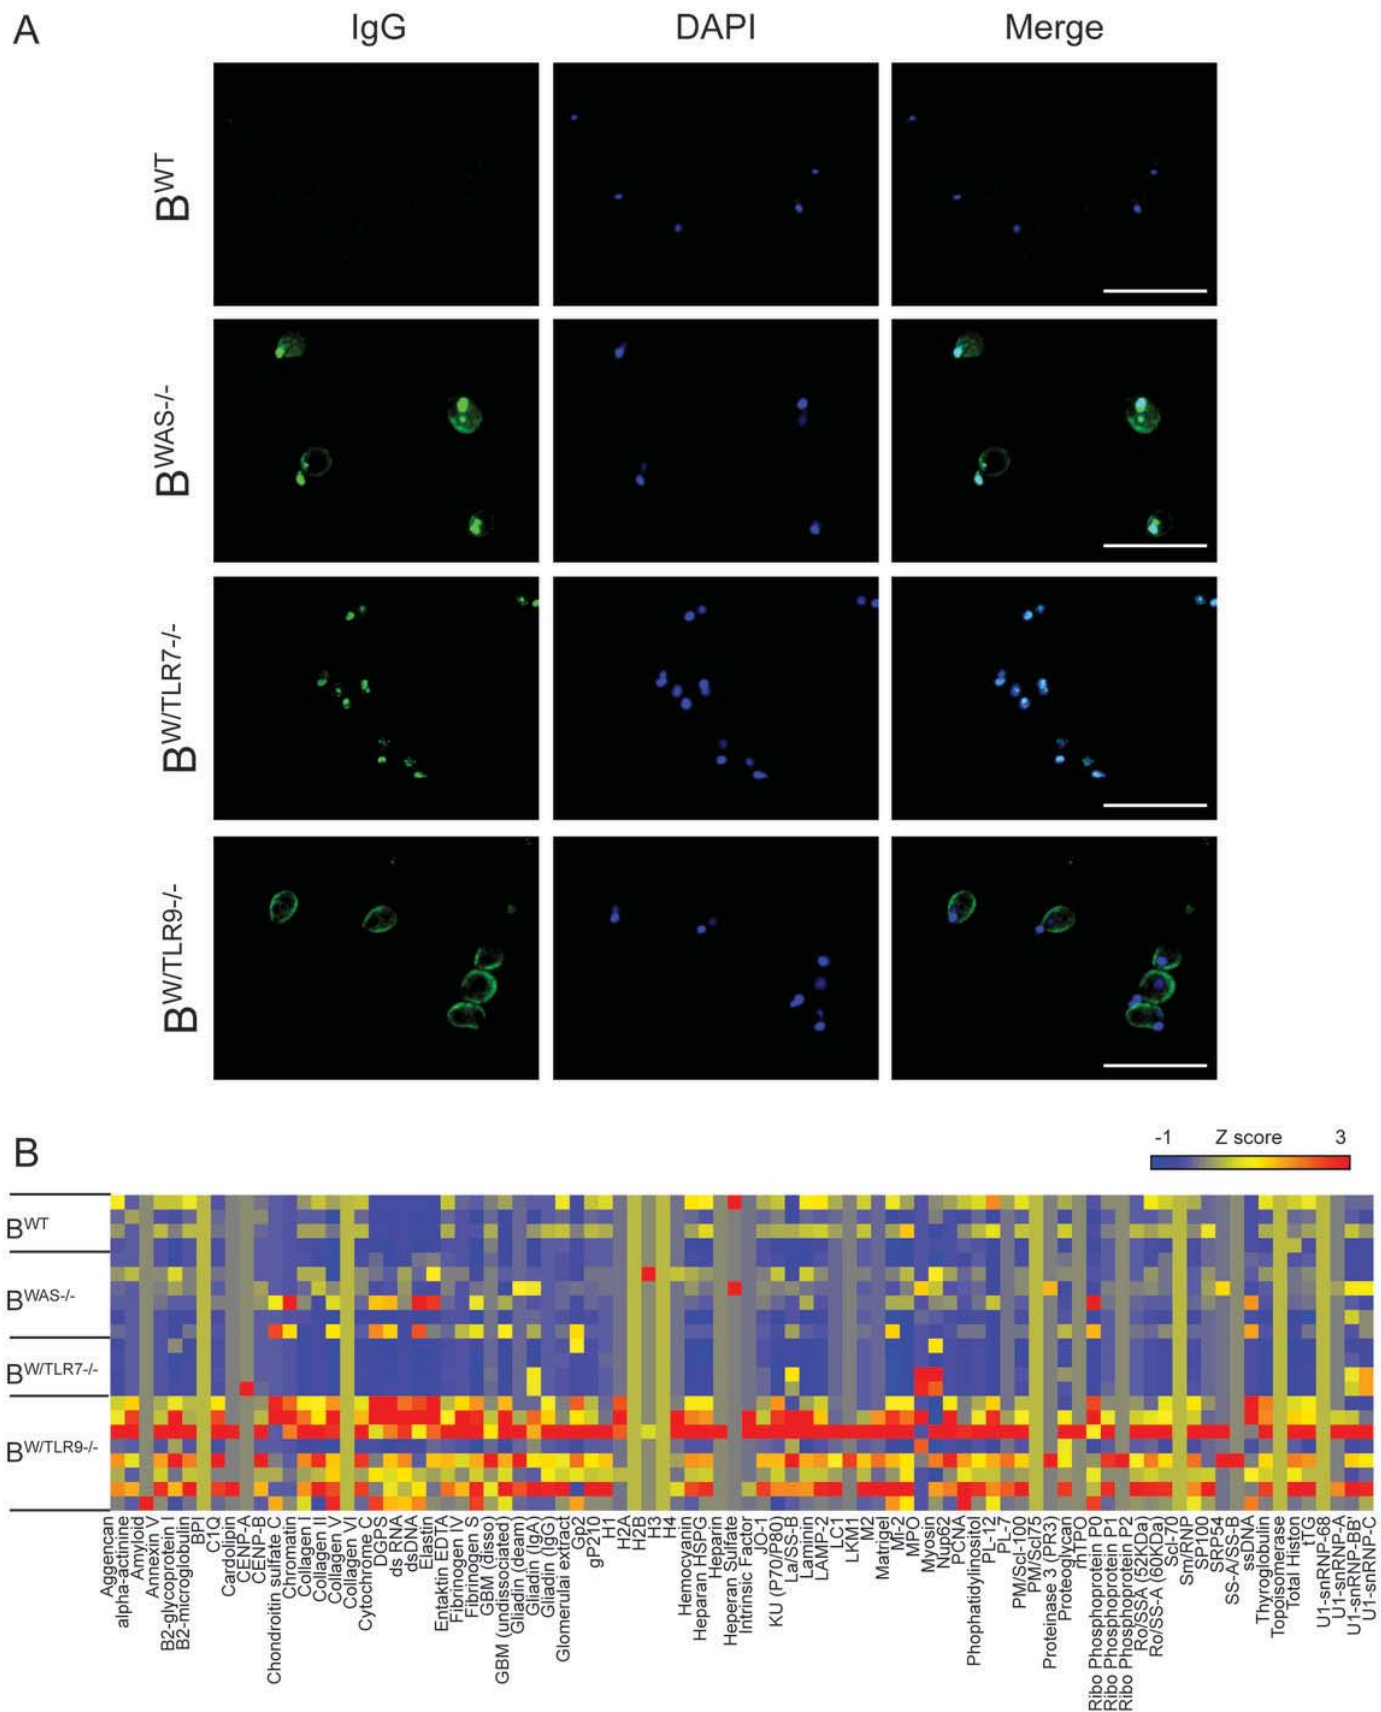

## Supplemental Figure 1: B cell-intrinsic TLR7 and TLR9 signals alter the autoantibody repertoire

(A) Representative images of *C. luciliae* staining in  $B^{WT}$ ,  $B^{WAS-/-}$ ,  $B^{W/TLR7-/-}$  and  $B^{W/TLR9-/-}$  chimeras. Positive kinetoplast staining is denoted by colocalized IgG (green) and DAPI (blue).  $B^{WAS-/-}$  developed specific kinetoplast staining as well as protozoan cytoplasmic staining. In contrast, only specific kinetoplast staining was observed in  $B^{W/TLR7-/-}$ , while kinetoplast staining was absent in  $B^{W/TLR9-/-}$  despite cytoplasmic reactivity. Bars, 50 $\mu$ m. Total mice analyzed:  $B^{WT}$  (n=6),  $B^{WAS-/-}$  (n=18),  $B^{W/TLR7-/-}$  (n=11), and  $B^{W/TLR9-/-}$  (n=16), pooled from 4 independent experimental cohorts. (B) Serum IgG2c Abs from  $B^{WT}$  (n=4),  $B^{WAS-/-}$  (N=6),  $B^{W/TLR7-/-}$  (n=4) and  $B^{W/TLR9-/-}$  (n=8) chimeras determined using an autoantibody array chip containing 88 specific autoantigens. Data are represented as a heat map of Z-scores ranging from -1 (blue) to 3 (red). Representative of two independent microarray analyses.
